# Supplementary material for: Generation and Next-Generation Sequencing-Based Characterization of a Large Human Combinatorial Antibody Library
Source: MDPI journal article supplement (doi:10.3390/ijms24066011), 2023-03-22
Supplement: s1 [file s1]

# Generation and Next Generation Sequencing-based Characterization of a Large Human Combinatorial Antibody Library

Hye Lim Choi <sup>1</sup>, Ha Rim Yang <sup>1</sup>, Ha Gyeong Shin <sup>1</sup>, Kyusang Hwang <sup>1</sup>, Ji Woong Kim <sup>2</sup>, Ji Hyun Lee <sup>1</sup>, Taehoon Ryu <sup>3</sup>, Yushin Jung <sup>3</sup> and Sukmook Lee <sup>1,4,5,\*</sup>

<sup>1</sup> Department of Biopharmaceutical Chemistry, Kookmin University, Seoul 02707, Republic of Korea

<sup>2</sup> Department of Chemistry, Kookmin University, Seoul 02707, Republic of Korea

<sup>3</sup> ATG Lifetech Inc., Seoul 08507, Republic of Korea

<sup>4</sup> Department of Applied Chemistry, Kookmin University, Seoul 02707, Republic of Korea

<sup>5</sup> Antibody Research Institute, Kookmin University, Seoul 02707, Republic of Korea

\* Correspondence: lees2018@kookmin.ac.kr; Tel.: +82-2-910-6763

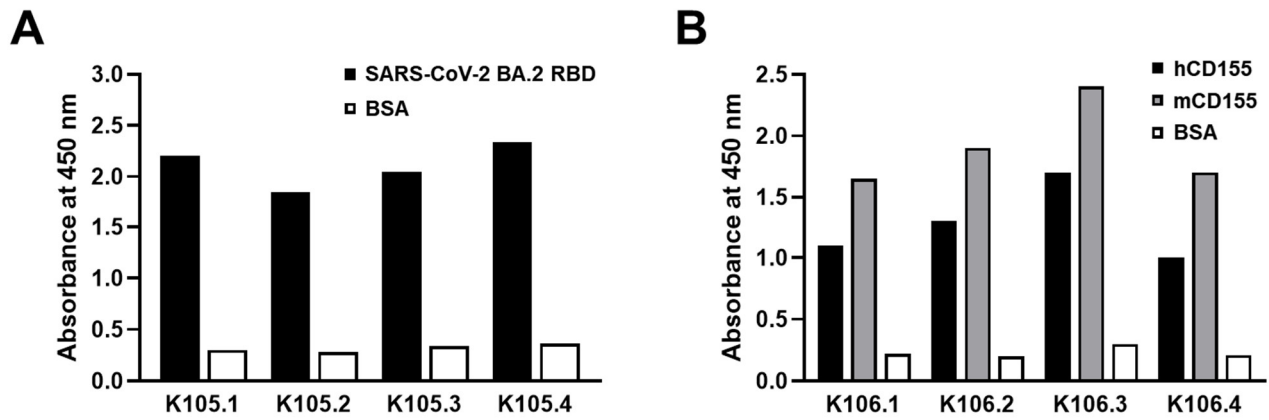

**Supplementary Figure S1.** Specific binding of the selected scFvs to target antigens. Phage ELISA was performed to verify the reactivity of the selected scFvs to SARS-CoV-2 BA.2 RBD (A) or the cross-species reactivity of the selected scFvs to human and mouse CD155 (hCD155 and mCD155) (B). Bovine serum albumin (BSA) was used as a negative control.

**A**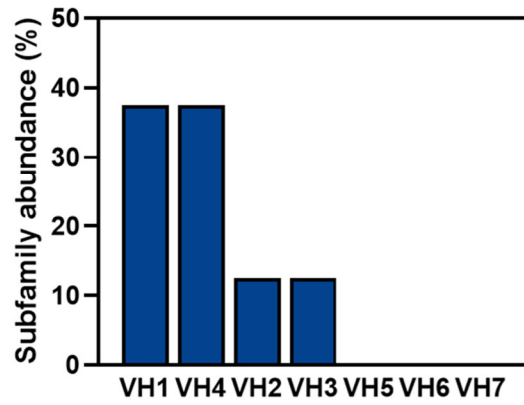**B**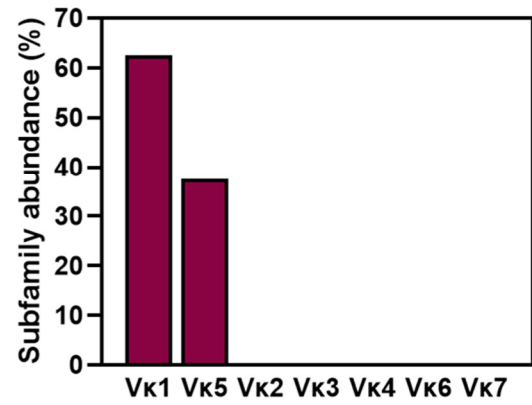

**Supplementary Figure S2.** Abundance of each variable domain subfamily observed in the scFvs selected from the constructed library. Following the germline classification of the antibody sequences selected from the library, each VH (A) and Vκ (B) subfamily was depicted as percentage bar graphs.

**Supplementary Table S1.** Primers used for the construction of human combinatorial antibody library.

| Primer name                          | 5' to 3' Sequence                                                             |
|--------------------------------------|-------------------------------------------------------------------------------|
| <i>Primers for VH germline genes</i> |                                                                               |
| HSCVH1-FL                            | GGTGGTTCCTCTAGATCTTCCTCCTCTGGTGGCGGTGGCTCGGGCGGTGGTGGGCAGGTGCAGCTGGTGCAGTCTGG |
| HSCVH2-FL                            | GGTGGTTCCTCTAGATCTTCCTCCTCTGGTGGCGGTGGCTCGGGCGGTGGTGGGCAGATCACCTTGAAGGAGTCTGG |
| HSCVH35-FL                           | GGTGGTTCCTCTAGATCTTCCTCCTCTGGTGGCGGTGGCTCGGGCGGTGGTGGGGAGGTGCAGCTGGTGSAGTCTGG |
| HSCVH3a-FL                           | GGTGGTTCCTCTAGATCTTCCTCCTCTGGTGGCGGTGGCTCGGGCGGTGGTGGGGAGGTGCAGCTGKTGGAGTCTG  |
| HSCVH4-FL                            | GGTGGTTCCTCTAGATCTTCCTCCTCTGGTGGCGGTGGCTCGGGCGGTGGTGGGCAGGTGCAGCTGCAGGAGTCGGG |
| HSCVH4a-FL                           | GGTGGTTCCTCTAGATCTTCCTCCTCTGGTGGCGGTGGCTCGGGCGGTGGTGGGCAGGTGCAGCTACAGCAGTGGGG |
| VH1 Fw                               | GGTGGTTCCTCTAGATCTTCCTCCTCTGGTGGCGGTGGCTCGGGCGGTGGTGGGCAGGTCCAGCTKGTRCAGTCTGG |
| VH1 Fw_2                             | GGTGGTTCCTCTAGATCTTCCTCCTCTGGTGGCGGTGGCTCGGGCGGTGGTGGGCAGGTGCAGCTGGTGAATCTGG  |
| VH157 Fw                             | GGTGGTTCCTCTAGATCTTCCTCCTCTGGTGGCGGTGGCTCGGGCGGTGGTGGGCAGGTGCAGCTGGTGGARTCTGG |
| VH2 Fw                               | GGTGGTTCCTCTAGATCTTCCTCCTCTGGTGGCGGTGGCTCGGGCGGTGGTGGGCAGGTGCAGCTGAAGGAGTCTG  |
| VH4 Fw                               | GGTGGTTCCTCTAGATCTTCCTCCTCTGGTGGCGGTGGCTCGGGCGGTGGTGGGCAGGTGCAGCTGCAGGAGTCCG  |
| VH6 Fw                               | GGTGGTTCCTCTAGATCTTCCTCCTCTGGTGGCGGTGGCTCGGGCGGTGGTGGGCAGGTACAGCTGCAGCAGTCA   |
| HSCG1234-B                           | CCTGGCCGGCCTGGCCACTAGTGACCGATGGGCCCTTGGTGGARG                                 |
| HSCM-B                               | CCTGGCCGGCCTGGCCACTAGTAAGGGTTGGGGCGGATGCACTCCC                                |
| <i>Primers for Vk germline genes</i> |                                                                               |
| HSCK1-F                              | GGGCCCAGGCGGCCGAGCTCCAGATGACCCAGTCTCC                                         |
| HSCK24-F                             | GGGCCCAGGCGGCCGAGCTCGTGATGACYCAGTCTCC                                         |
| HSCK3-F                              | GGGCCCAGGCGGCCGAGCTCGTGWTGACRCAGTCTCC                                         |
| HSCK5-F                              | GGGCCCAGGCGGCCGAGCTCACACTCACGCAGTCTCC                                         |
| VK1 Fw                               | GGGCCCAGGCGGCCGACATCCRGDTGACCCAGTCTCC                                         |
| VK3 Fw                               | GGGCCCAGGCGGCCGAAATTGTRWTGACRCAGTCTCC                                         |
| VK5 Fw                               | GGGCCCAGGCGGCCGAAACGACACTCACGCAGTCTC                                          |
| VK246 Fw                             | GGGCCCAGGCGGCCGATATTGTGMTGACBCAGWCTCC                                         |
| Vk-2 Fw                              | GGGCCCAGGCGGCCGATGTTGTGATGACYCAG                                              |
| Vk-4 Fw                              | GGGCCCAGGCGGCCGACATCGTGATGACCCAGT                                             |
| Vk-1 Fw_2                            | GGGCCCAGGCGGCCGCCATCCGGTTGACCCAGT                                             |
| HSCJK140-B                           | GGAAGATCTAGAGGAACCACCTTTGATSTCCACCTTGGTCCC                                    |
| HSCJK20-B                            | GGAAGATCTAGAGGAACCACCTTTGATCTCCAGCTTGGTCCC                                    |
| HSCJK30-B                            | GGAAGATCTAGAGGAACCACCTTTGATATCCACTTTGGTCCC                                    |
| HSCJK50-B                            | GGAAGATCTAGAGGAACCACCTTTAATCTCCAGTCGTGTC                                      |

**Supplementary Table S2.** The percentage of pairing of germline V and J gene segments in each VH and V $\kappa$  of the constructed library.

| VH            | IGHJ<br>1-01 | IGHJ<br>2-01 | IGHJ<br>3-01 | IGHJ<br>3-02 | IGHJ<br>4-01 | IGHJ<br>4-02 | IGHJ<br>4-03 | IGHJ<br>5-01 | IGHJ<br>5-02 | IGHJ<br>6-01 | IGHJ<br>6-02 | IGHJ<br>6-03 | IGHJ<br>6-04 |
|---------------|--------------|--------------|--------------|--------------|--------------|--------------|--------------|--------------|--------------|--------------|--------------|--------------|--------------|
| IGHV1-18      | 0.012        | 0.009        | 0.019        | 0.085        | 0.003        | 0.350        | 0.001        | 0.003        | 0.078        | 0.001        | 0.105        | 0.043        | 0.002        |
| IGHV1-2       | 0.017        | 0.012        | 0.028        | 0.099        | 0.004        | 0.573        | 0.002        | 0.006        | 0.170        | 0.003        | 0.151        | 0.061        | 0.001        |
| IGHV1-24      | 0.003        | 0.004        | 0.004        | 0.027        | 0.000        | 0.049        | 0.000        | 0.000        | 0.019        | 0.000        | 0.030        | 0.007        | 0.000        |
| IGHV1-3       | 0.005        | 0.008        | 0.017        | 0.037        | 0.003        | 0.194        | 0.001        | 0.003        | 0.082        | 0.000        | 0.054        | 0.037        | 0.001        |
| IGHV1-38-4    | 0.000        | 0.000        | 0.000        | 0.000        | 0.000        | 0.000        | 0.000        | 0.000        | 0.000        | 0.000        | 0.000        | 0.000        | 0.000        |
| IGHV1-45      | 0.000        | 0.000        | 0.000        | 0.008        | 0.000        | 0.001        | 0.000        | 0.000        | 0.000        | 0.000        | 0.002        | 0.000        | 0.000        |
| IGHV1-46      | 0.013        | 0.010        | 0.011        | 0.094        | 0.003        | 0.387        | 0.001        | 0.004        | 0.088        | 0.001        | 0.080        | 0.030        | 0.000        |
| IGHV1-58      | 0.000        | 0.000        | 0.000        | 0.001        | 0.000        | 0.008        | 0.000        | 0.000        | 0.002        | 0.000        | 0.003        | 0.001        | 0.000        |
| IGHV1-69      | 0.044        | 0.065        | 0.064        | 0.239        | 0.007        | 0.745        | 0.002        | 0.014        | 0.214        | 0.003        | 0.388        | 0.148        | 0.002        |
| IGHV1-69-2    | 0.000        | 0.000        | 0.000        | 0.001        | 0.000        | 0.009        | 0.000        | 0.000        | 0.001        | 0.000        | 0.002        | 0.000        | 0.000        |
| IGHV1-8       | 0.055        | 0.014        | 0.006        | 0.040        | 0.001        | 0.176        | 0.009        | 0.001        | 0.054        | 0.000        | 0.048        | 0.030        | 0.000        |
| IGHV1/OR15-1  | 0.000        | 0.000        | 0.000        | 0.000        | 0.000        | 0.000        | 0.000        | 0.000        | 0.000        | 0.000        | 0.000        | 0.000        | 0.000        |
| IGHV1/OR15-2  | 0.000        | 0.000        | 0.000        | 0.000        | 0.000        | 0.000        | 0.000        | 0.000        | 0.000        | 0.000        | 0.000        | 0.000        | 0.000        |
| IGHV1/OR15-3  | 0.000        | 0.000        | 0.000        | 0.000        | 0.000        | 0.000        | 0.000        | 0.000        | 0.000        | 0.000        | 0.000        | 0.000        | 0.000        |
| IGHV2-26      | 0.028        | 1.005        | 0.100        | 0.412        | 0.009        | 1.968        | 0.003        | 0.018        | 1.493        | 0.007        | 1.150        | 0.218        | 0.004        |
| IGHV2-5       | 0.293        | 0.486        | 0.562        | 1.893        | 0.097        | 13.331       | 0.236        | 0.147        | 2.455        | 0.003        | 1.274        | 0.448        | 0.009        |
| IGHV2-70      | 0.008        | 0.025        | 0.094        | 0.293        | 0.011        | 0.984        | 0.002        | 0.033        | 0.340        | 0.001        | 0.269        | 0.106        | 0.002        |
| IGHV2-70D     | 0.004        | 0.041        | 0.097        | 0.426        | 0.008        | 1.424        | 0.002        | 0.046        | 0.218        | 0.001        | 0.389        | 0.060        | 0.005        |
| IGHV3-11      | 0.005        | 0.013        | 0.015        | 0.041        | 0.002        | 0.216        | 0.000        | 0.004        | 0.028        | 0.000        | 0.044        | 0.022        | 0.001        |
| IGHV3-13      | 0.001        | 0.019        | 0.002        | 0.011        | 0.000        | 0.036        | 0.000        | 0.000        | 0.006        | 0.000        | 0.012        | 0.004        | 0.000        |
| IGHV3-15      | 0.008        | 0.007        | 0.006        | 0.028        | 0.001        | 0.196        | 0.002        | 0.002        | 0.025        | 0.000        | 0.047        | 0.011        | 0.000        |
| IGHV3-20      | 0.000        | 0.002        | 0.001        | 0.003        | 0.000        | 0.018        | 0.000        | 0.000        | 0.004        | 0.000        | 0.004        | 0.004        | 0.000        |
| IGHV3-21      | 0.003        | 0.006        | 0.008        | 0.031        | 0.002        | 0.160        | 0.000        | 0.002        | 0.024        | 0.000        | 0.041        | 0.017        | 0.000        |
| IGHV3-22      | 0.000        | 0.000        | 0.000        | 0.000        | 0.000        | 0.000        | 0.000        | 0.000        | 0.000        | 0.000        | 0.000        | 0.000        | 0.000        |
| IGHV3-23      | 0.021        | 0.035        | 0.030        | 0.112        | 0.012        | 0.737        | 0.001        | 0.012        | 0.091        | 0.000        | 0.133        | 0.050        | 0.001        |
| IGHV3-30      | 0.026        | 0.028        | 0.026        | 0.095        | 0.007        | 0.648        | 0.001        | 0.007        | 0.086        | 0.000        | 0.134        | 0.054        | 0.001        |
| IGHV3-30-3    | 0.010        | 0.007        | 0.008        | 0.049        | 0.002        | 0.193        | 0.001        | 0.001        | 0.035        | 0.000        | 0.066        | 0.016        | 0.000        |
| IGHV3-33      | 0.007        | 0.032        | 0.007        | 0.074        | 0.004        | 0.269        | 0.001        | 0.003        | 0.039        | 0.001        | 0.075        | 0.008        | 0.000        |
| IGHV3-35      | 0.000        | 0.000        | 0.000        | 0.000        | 0.000        | 0.000        | 0.000        | 0.000        | 0.000        | 0.000        | 0.000        | 0.000        | 0.000        |
| IGHV3-43      | 0.001        | 0.002        | 0.003        | 0.003        | 0.001        | 0.049        | 0.000        | 0.001        | 0.006        | 0.000        | 0.009        | 0.008        | 0.000        |
| IGHV3-43D     | 0.001        | 0.001        | 0.002        | 0.003        | 0.001        | 0.025        | 0.000        | 0.001        | 0.004        | 0.000        | 0.015        | 0.004        | 0.000        |
| IGHV3-47      | 0.000        | 0.000        | 0.000        | 0.000        | 0.000        | 0.000        | 0.000        | 0.000        | 0.000        | 0.000        | 0.000        | 0.000        | 0.000        |
| IGHV3-48      | 0.007        | 0.014        | 0.015        | 0.055        | 0.004        | 0.280        | 0.000        | 0.005        | 0.041        | 0.000        | 0.052        | 0.025        | 0.000        |
| IGHV3-49      | 0.007        | 0.005        | 0.003        | 0.018        | 0.001        | 0.126        | 0.000        | 0.003        | 0.020        | 0.000        | 0.024        | 0.018        | 0.000        |
| IGHV3-52      | 0.000        | 0.000        | 0.000        | 0.000        | 0.000        | 0.000        | 0.000        | 0.000        | 0.000        | 0.000        | 0.000        | 0.000        | 0.000        |
| IGHV3-53      | 0.004        | 0.008        | 0.008        | 0.030        | 0.001        | 0.110        | 0.000        | 0.001        | 0.016        | 0.000        | 0.032        | 0.010        | 0.000        |
| IGHV3-64      | 0.001        | 0.002        | 0.002        | 0.004        | 0.000        | 0.031        | 0.000        | 0.000        | 0.004        | 0.000        | 0.005        | 0.002        | 0.000        |
| IGHV3-64D     | 0.000        | 0.004        | 0.001        | 0.004        | 0.000        | 0.028        | 0.000        | 0.001        | 0.002        | 0.000        | 0.012        | 0.000        | 0.000        |
| IGHV3-66      | 0.004        | 0.004        | 0.006        | 0.015        | 0.001        | 0.073        | 0.000        | 0.001        | 0.008        | 0.000        | 0.012        | 0.010        | 0.000        |
| IGHV3-69-1    | 0.000        | 0.000        | 0.000        | 0.000        | 0.000        | 0.003        | 0.000        | 0.000        | 0.001        | 0.000        | 0.001        | 0.000        | 0.000        |
| IGHV3-7       | 0.012        | 0.009        | 0.007        | 0.033        | 0.002        | 0.231        | 0.000        | 0.003        | 0.034        | 0.000        | 0.044        | 0.021        | 0.000        |
| IGHV3-71      | 0.000        | 0.000        | 0.000        | 0.000        | 0.000        | 0.001        | 0.000        | 0.000        | 0.000        | 0.000        | 0.000        | 0.000        | 0.000        |
| IGHV3-72      | 0.008        | 0.005        | 0.006        | 0.026        | 0.002        | 0.073        | 0.000        | 0.000        | 0.006        | 0.000        | 0.013        | 0.005        | 0.000        |
| IGHV3-73      | 0.001        | 0.003        | 0.003        | 0.015        | 0.002        | 0.075        | 0.000        | 0.000        | 0.014        | 0.000        | 0.008        | 0.007        | 0.000        |
| IGHV3-74      | 0.004        | 0.011        | 0.008        | 0.033        | 0.001        | 0.177        | 0.000        | 0.002        | 0.030        | 0.000        | 0.048        | 0.010        | 0.000        |
| IGHV3-9       | 0.019        | 0.032        | 0.030        | 0.112        | 0.003        | 0.439        | 0.004        | 0.006        | 0.050        | 0.000        | 0.095        | 0.047        | 0.000        |
| IGHV3-NL1     | 0.001        | 0.001        | 0.001        | 0.003        | 0.000        | 0.016        | 0.000        | 0.000        | 0.002        | 0.000        | 0.003        | 0.001        | 0.000        |
| IGHV3/OR16-10 | 0.000        | 0.000        | 0.000        | 0.000        | 0.000        | 0.000        | 0.000        | 0.000        | 0.000        | 0.000        | 0.000        | 0.000        | 0.000        |
| IGHV3/OR16-8  | 0.000        | 0.000        | 0.000        | 0.000        | 0.000        | 0.000        | 0.000        | 0.000        | 0.000        | 0.000        | 0.000        | 0.000        | 0.000        |
| IGHV4-28      | 0.000        | 0.002        | 0.000        | 0.006        | 0.000        | 0.017        | 0.000        | 0.001        | 0.008        | 0.000        | 0.005        | 0.001        | 0.000        |
| IGHV4-30-2    | 0.003        | 0.014        | 0.010        | 0.025        | 0.002        | 0.118        | 0.000        | 0.002        | 0.040        | 0.000        | 0.020        | 0.005        | 0.000        |

|              |       |       |       |       |       |        |       |       |       |       |       |       |       |
|--------------|-------|-------|-------|-------|-------|--------|-------|-------|-------|-------|-------|-------|-------|
| IGHV4-30-4   | 0.008 | 0.034 | 0.017 | 0.079 | 0.008 | 0.386  | 0.001 | 0.011 | 0.118 | 0.000 | 0.076 | 0.037 | 0.001 |
| IGHV4-31     | 0.011 | 0.067 | 0.048 | 0.164 | 0.027 | 0.673  | 0.002 | 0.013 | 0.174 | 0.001 | 0.283 | 0.019 | 0.001 |
| IGHV4-34     | 0.188 | 0.715 | 0.434 | 1.062 | 0.073 | 10.667 | 0.013 | 0.053 | 2.424 | 0.024 | 2.629 | 0.480 | 0.011 |
| IGHV4-38-2   | 0.046 | 0.124 | 0.053 | 0.229 | 0.018 | 1.116  | 0.003 | 0.014 | 0.313 | 0.001 | 0.181 | 0.079 | 0.002 |
| IGHV4-39     | 0.092 | 0.204 | 0.097 | 0.574 | 0.038 | 3.059  | 0.009 | 0.048 | 0.983 | 0.002 | 0.679 | 0.212 | 0.003 |
| IGHV4-4      | 0.024 | 0.058 | 0.046 | 0.189 | 0.015 | 1.089  | 0.002 | 0.024 | 0.285 | 0.001 | 0.294 | 0.035 | 0.001 |
| IGHV4-55     | 0.000 | 0.000 | 0.000 | 0.000 | 0.000 | 0.001  | 0.000 | 0.000 | 0.000 | 0.000 | 0.000 | 0.000 | 0.000 |
| IGHV4-59     | 0.035 | 0.281 | 0.079 | 0.390 | 0.018 | 1.447  | 0.003 | 0.068 | 0.507 | 0.001 | 0.537 | 0.113 | 0.002 |
| IGHV4-61     | 0.017 | 0.091 | 0.030 | 0.159 | 0.008 | 0.835  | 0.001 | 0.033 | 0.204 | 0.001 | 0.195 | 0.070 | 0.004 |
| IGHV4/OR15-8 | 0.000 | 0.001 | 0.000 | 0.001 | 0.000 | 0.015  | 0.000 | 0.001 | 0.001 | 0.000 | 0.002 | 0.000 | 0.000 |
| IGHV5-10-1   | 0.001 | 0.006 | 0.005 | 0.029 | 0.001 | 0.053  | 0.000 | 0.000 | 0.017 | 0.000 | 0.036 | 0.001 | 0.002 |
| IGHV5-51     | 0.019 | 0.039 | 0.046 | 0.266 | 0.005 | 0.615  | 0.002 | 0.009 | 0.140 | 0.000 | 0.151 | 0.051 | 0.001 |
| IGHV6-1      | 0.478 | 0.456 | 0.216 | 1.917 | 0.039 | 8.102  | 0.011 | 0.061 | 1.228 | 0.003 | 2.979 | 0.124 | 0.005 |
| IGHV7-4-1    | 0.007 | 0.013 | 0.020 | 0.036 | 0.001 | 0.264  | 0.002 | 0.003 | 0.067 | 0.000 | 0.044 | 0.035 | 0.000 |
| IGHV7-81     | 0.000 | 0.000 | 0.000 | 0.000 | 0.000 | 0.000  | 0.000 | 0.000 | 0.000 | 0.000 | 0.000 | 0.000 | 0.000 |

| Vκ            | IGKJ1-01 | IGKJ2-01 | IGKJ2-02 | IGKJ2-03 | IGKJ2-04 | IGKJ3-01 | IGKJ4-01 | IGKJ4-02 | IGKJ5-01 |
|---------------|----------|----------|----------|----------|----------|----------|----------|----------|----------|
| IGKV1-12      | 0.099    | 0.219    | 0.005    | 0.005    | 0.001    | 0.431    | 0.657    | 0.009    | 1.021    |
| IGKV1-13      | 0.032    | 0.073    | 0.001    | 0.001    | 0.000    | 0.337    | 0.562    | 0.001    | 1.128    |
| IGKV1-16      | 0.089    | 0.139    | 0.003    | 0.003    | 0.001    | 0.355    | 0.448    | 0.002    | 0.872    |
| IGKV1-17      | 0.150    | 0.165    | 0.006    | 0.004    | 0.001    | 0.208    | 0.512    | 0.003    | 0.333    |
| IGKV1-27      | 0.120    | 0.080    | 0.002    | 0.002    | 0.000    | 0.617    | 0.535    | 0.002    | 0.319    |
| IGKV1-33      | 0.069    | 0.500    | 0.009    | 0.017    | 0.005    | 1.198    | 1.646    | 0.006    | 2.321    |
| IGKV1-37      | 0.004    | 0.021    | 0.000    | 0.009    | 0.000    | 0.021    | 0.047    | 0.000    | 0.199    |
| IGKV1-39      | 0.635    | 1.099    | 0.035    | 0.034    | 0.012    | 1.617    | 1.551    | 0.012    | 2.776    |
| IGKV1-5       | 0.627    | 0.507    | 0.017    | 0.024    | 0.008    | 0.347    | 0.749    | 0.005    | 0.617    |
| IGKV1-6       | 0.123    | 0.128    | 0.002    | 0.001    | 0.000    | 0.069    | 0.241    | 0.001    | 0.080    |
| IGKV1-8       | 0.142    | 0.146    | 0.002    | 0.001    | 0.001    | 0.395    | 0.525    | 0.003    | 0.564    |
| IGKV1-9       | 0.104    | 0.290    | 0.008    | 0.010    | 0.003    | 0.919    | 0.958    | 0.005    | 2.695    |
| IGKV1-NL1     | 0.068    | 0.078    | 0.002    | 0.001    | 0.000    | 0.093    | 0.137    | 0.000    | 0.545    |
| IGKV1/OR-3    | 0.000    | 0.000    | 0.000    | 0.000    | 0.000    | 0.000    | 0.000    | 0.000    | 0.000    |
| IGKV1/OR-4    | 0.000    | 0.000    | 0.000    | 0.000    | 0.000    | 0.000    | 0.000    | 0.000    | 0.000    |
| IGKV1/OR10-1  | 0.000    | 0.000    | 0.000    | 0.000    | 0.000    | 0.000    | 0.000    | 0.000    | 0.000    |
| IGKV1/OR2-1   | 0.000    | 0.000    | 0.000    | 0.000    | 0.000    | 0.000    | 0.000    | 0.000    | 0.000    |
| IGKV1/OR2-108 | 0.000    | 0.000    | 0.000    | 0.000    | 0.000    | 0.000    | 0.001    | 0.000    | 0.000    |
| IGKV1D-12     | 0.010    | 0.041    | 0.002    | 0.000    | 0.000    | 0.089    | 0.137    | 0.001    | 0.246    |
| IGKV1D-13     | 0.009    | 0.072    | 0.000    | 0.000    | 0.000    | 0.087    | 0.109    | 0.000    | 0.093    |
| IGKV1D-16     | 0.018    | 0.027    | 0.001    | 0.001    | 0.000    | 0.046    | 0.087    | 0.000    | 0.205    |
| IGKV1D-17     | 0.000    | 0.000    | 0.000    | 0.000    | 0.000    | 0.000    | 0.000    | 0.000    | 0.000    |
| IGKV1D-43     | 0.003    | 0.005    | 0.000    | 0.000    | 0.000    | 0.115    | 0.026    | 0.000    | 0.093    |
| IGKV1D-8      | 0.005    | 0.007    | 0.000    | 0.000    | 0.000    | 0.003    | 0.007    | 0.000    | 0.010    |
| IGKV2-18      | 0.000    | 0.000    | 0.000    | 0.000    | 0.000    | 0.001    | 0.001    | 0.000    | 0.001    |
| IGKV2-24      | 0.069    | 0.196    | 0.003    | 0.002    | 0.000    | 0.152    | 0.181    | 0.000    | 0.489    |
| IGKV2-28      | 0.244    | 0.547    | 0.054    | 0.007    | 0.005    | 1.364    | 1.022    | 0.005    | 2.025    |
| IGKV2-29      | 0.020    | 0.051    | 0.002    | 0.001    | 0.000    | 0.078    | 0.126    | 0.000    | 0.189    |
| IGKV2-30      | 0.340    | 0.622    | 0.016    | 0.008    | 0.002    | 1.339    | 0.849    | 0.002    | 2.042    |
| IGKV2-4       | 0.000    | 0.000    | 0.000    | 0.000    | 0.000    | 0.000    | 0.000    | 0.000    | 0.000    |
| IGKV2-40      | 0.011    | 0.059    | 0.001    | 0.007    | 0.000    | 0.034    | 0.051    | 0.000    | 0.156    |
| IGKV2D-18     | 0.000    | 0.000    | 0.000    | 0.000    | 0.000    | 0.000    | 0.000    | 0.000    | 0.000    |
| IGKV2D-24     | 0.001    | 0.001    | 0.000    | 0.000    | 0.000    | 0.001    | 0.001    | 0.000    | 0.002    |
| IGKV2D-26     | 0.001    | 0.001    | 0.000    | 0.000    | 0.000    | 0.001    | 0.009    | 0.000    | 0.001    |
| IGKV2D-29     | 0.148    | 0.302    | 0.004    | 0.003    | 0.001    | 0.724    | 0.810    | 0.002    | 0.831    |
| IGKV2D-30     | 0.017    | 0.039    | 0.000    | 0.001    | 0.000    | 0.091    | 0.058    | 0.000    | 0.206    |
| IGKV3-11      | 0.102    | 0.182    | 0.005    | 0.003    | 0.005    | 0.874    | 1.164    | 0.003    | 1.640    |

|                      |       |       |       |       |       |       |       |       |       |
|----------------------|-------|-------|-------|-------|-------|-------|-------|-------|-------|
| <b>IGKV3-15</b>      | 0.462 | 0.723 | 0.022 | 0.012 | 0.005 | 0.848 | 1.449 | 0.014 | 1.641 |
| <b>IGKV3-20</b>      | 1.164 | 1.695 | 0.056 | 0.030 | 0.009 | 2.969 | 2.976 | 0.009 | 3.316 |
| <b>IGKV3-7</b>       | 0.000 | 0.000 | 0.000 | 0.000 | 0.000 | 0.001 | 0.000 | 0.000 | 0.001 |
| <b>IGKV3/OR2-268</b> | 0.004 | 0.008 | 0.000 | 0.000 | 0.000 | 0.011 | 0.016 | 0.000 | 0.016 |
| <b>IGKV3D-11</b>     | 0.001 | 0.003 | 0.000 | 0.000 | 0.000 | 0.007 | 0.006 | 0.000 | 0.022 |
| <b>IGKV3D-15</b>     | 0.049 | 0.082 | 0.003 | 0.001 | 0.001 | 0.076 | 0.192 | 0.002 | 0.359 |
| <b>IGKV3D-20</b>     | 0.065 | 0.108 | 0.004 | 0.001 | 0.001 | 0.274 | 0.405 | 0.002 | 0.496 |
| <b>IGKV4-1</b>       | 1.555 | 2.195 | 0.058 | 0.026 | 0.023 | 4.017 | 5.313 | 0.027 | 6.065 |
| <b>IGKV5-2</b>       | 0.701 | 1.520 | 0.013 | 0.175 | 0.003 | 1.413 | 1.012 | 0.004 | 0.120 |
| <b>IGKV6-21</b>      | 0.008 | 0.015 | 0.000 | 0.000 | 0.000 | 0.027 | 0.033 | 0.000 | 0.209 |
| <b>IGKV6D-21</b>     | 0.003 | 0.007 | 0.000 | 0.001 | 0.000 | 0.003 | 0.008 | 0.000 | 0.015 |
| <b>IGKV6D-41</b>     | 0.000 | 0.000 | 0.000 | 0.000 | 0.000 | 0.000 | 0.001 | 0.000 | 0.000 |
| <b>IGKV7-3</b>       | 0.000 | 0.001 | 0.000 | 0.000 | 0.000 | 0.000 | 0.002 | 0.000 | 0.000 |

The percentages of all the pairing of germline V and J gene segments having cut-off  $\geq 0.001$  are represented. In case of the pairing of the gene segments cut-off  $< 0.001$  were expressed as 0.000.

**Supplementary Table S3.** The percentage of amino acid composition at each position in HCDRs of the constructed library.

| Position | A     | C    | D     | E     | F     | G     | H     | I     | K     | L     | M     | N     | P     | Q     | R     | S     | T     | V     | W     | Y     |
|----------|-------|------|-------|-------|-------|-------|-------|-------|-------|-------|-------|-------|-------|-------|-------|-------|-------|-------|-------|-------|
| H31      | 1.58  | 0.10 | 4.97  | 0.32  | 0.06  | 16.58 | 0.27  | 0.68  | 0.29  | 0.06  | 0.05  | 9.96  | 0.40  | 0.03  | 1.83  | 36.73 | 25.66 | 0.20  | 0.00  | 0.23  |
| H32      | 4.88  | 0.20 | 1.81  | 0.19  | 1.38  | 7.54  | 2.87  | 0.64  | 0.28  | 0.38  | 0.02  | 15.03 | 1.31  | 0.09  | 1.86  | 23.85 | 4.80  | 0.34  | 0.01  | 32.52 |
| H33      | 7.13  | 0.24 | 2.78  | 1.19  | 1.20  | 27.60 | 0.82  | 0.62  | 0.67  | 0.29  | 0.03  | 3.30  | 0.99  | 0.21  | 5.66  | 16.94 | 3.12  | 0.63  | 3.21  | 23.34 |
| H34      | 11.09 | 0.43 | 0.37  | 0.79  | 1.11  | 1.40  | 0.76  | 6.67  | 0.03  | 2.09  | 20.28 | 0.26  | 0.10  | 0.05  | 0.13  | 0.74  | 0.80  | 19.79 | 21.61 | 11.49 |
| H35      | 12.28 | 2.13 | 0.49  | 0.02  | 0.70  | 24.31 | 7.54  | 0.41  | 0.05  | 0.15  | 0.05  | 4.87  | 0.18  | 0.22  | 3.29  | 22.90 | 5.22  | 0.70  | 4.73  | 9.77  |
| H35a     | 0.53  | 0.39 | 0.07  | 0.03  | 0.05  | 4.13  | 0.02  | 0.08  | 0.00  | 0.83  | 0.43  | 0.31  | 0.02  | 0.00  | 0.21  | 2.90  | 0.52  | 48.67 | 40.79 | 0.02  |
| H35b     | 3.58  | 0.22 | 0.85  | 0.00  | 0.04  | 43.06 | 1.05  | 0.41  | 0.03  | 0.04  | 0.00  | 23.34 | 0.04  | 0.00  | 0.31  | 23.23 | 2.72  | 0.61  | 0.00  | 0.47  |
| H50      | 1.29  | 0.21 | 0.78  | 17.58 | 1.91  | 3.89  | 6.13  | 3.29  | 1.09  | 16.73 | 0.27  | 2.03  | 0.04  | 0.46  | 19.57 | 7.73  | 1.79  | 4.33  | 2.90  | 7.99  |
| H51      | 0.28  | 0.01 | 0.01  | 0.00  | 1.06  | 0.12  | 0.01  | 75.92 | 0.05  | 1.37  | 1.68  | 0.13  | 0.02  | 0.00  | 0.06  | 0.65  | 14.23 | 4.38  | 0.00  | 0.03  |
| H52      | 0.42  | 0.17 | 6.14  | 0.11  | 8.17  | 0.42  | 2.52  | 2.32  | 1.19  | 0.49  | 0.04  | 18.46 | 0.04  | 0.17  | 1.27  | 8.64  | 1.11  | 0.22  | 0.62  | 47.46 |
| H52a     | 3.45  | 0.12 | 0.71  | 0.36  | 2.97  | 5.35  | 1.36  | 0.21  | 0.18  | 0.28  | 0.01  | 1.32  | 22.74 | 1.22  | 0.65  | 7.78  | 3.21  | 0.46  | 3.83  | 43.78 |
| H52b     | 0.16  | 0.04 | 0.31  | 0.35  | 0.03  | 1.94  | 0.01  | 0.12  | 7.38  | 0.64  | 5.03  | 0.55  | 0.01  | 0.18  | 79.53 | 1.69  | 1.47  | 0.04  | 0.48  | 0.05  |
| H52c     | 40.34 | 0.01 | 3.76  | 0.25  | 0.51  | 5.69  | 0.37  | 2.09  | 0.46  | 0.65  | 0.02  | 2.20  | 4.02  | 0.00  | 1.03  | 9.20  | 25.80 | 3.49  | 0.01  | 0.11  |
| H53      | 0.49  | 0.12 | 5.37  | 0.39  | 0.53  | 2.83  | 19.22 | 1.60  | 0.32  | 0.43  | 0.29  | 4.28  | 0.93  | 0.86  | 0.73  | 22.96 | 0.91  | 0.32  | 24.31 | 13.11 |
| H54      | 0.53  | 0.04 | 21.72 | 0.56  | 1.95  | 9.87  | 0.24  | 0.56  | 11.65 | 0.39  | 0.04  | 12.15 | 0.05  | 0.38  | 2.35  | 32.97 | 4.09  | 0.22  | 0.01  | 0.23  |
| H55      | 0.79  | 0.04 | 27.66 | 0.91  | 0.07  | 47.65 | 0.14  | 0.10  | 0.08  | 0.05  | 0.02  | 1.29  | 0.05  | 0.01  | 0.66  | 5.43  | 0.64  | 0.35  | 13.60 | 0.45  |
| H56      | 1.44  | 0.14 | 25.47 | 6.49  | 0.77  | 2.78  | 1.25  | 1.41  | 0.96  | 0.18  | 0.06  | 8.33  | 0.15  | 0.33  | 2.24  | 29.30 | 6.94  | 0.63  | 0.01  | 11.12 |
| H57      | 3.35  | 0.00 | 0.23  | 1.47  | 0.29  | 0.14  | 0.44  | 3.01  | 28.54 | 0.12  | 0.15  | 10.00 | 1.57  | 0.65  | 1.19  | 2.30  | 44.76 | 0.49  | 0.00  | 1.29  |
| H58      | 0.61  | 0.07 | 13.93 | 2.11  | 3.86  | 1.54  | 2.22  | 0.73  | 2.26  | 0.25  | 0.10  | 24.11 | 0.14  | 0.31  | 20.35 | 7.00  | 1.86  | 0.44  | 0.05  | 18.07 |
| H59      | 0.01  | 0.19 | 0.30  | 0.01  | 1.25  | 0.05  | 1.12  | 0.08  | 0.05  | 0.15  | 0.00  | 0.46  | 0.05  | 0.14  | 0.03  | 1.06  | 0.04  | 0.07  | 0.00  | 94.92 |
| H60      | 27.95 | 0.04 | 0.32  | 0.22  | 0.02  | 0.65  | 0.26  | 0.48  | 0.55  | 0.18  | 0.07  | 35.21 | 0.31  | 0.03  | 1.74  | 29.09 | 1.78  | 1.03  | 0.00  | 0.07  |
| H61      | 2.40  | 0.00 | 8.31  | 1.12  | 0.07  | 0.67  | 0.13  | 0.33  | 0.11  | 2.00  | 0.07  | 0.09  | 57.18 | 7.00  | 0.31  | 1.45  | 9.66  | 9.07  | 0.02  | 0.01  |
| H62      | 0.64  | 0.02 | 0.10  | 0.05  | 0.59  | 0.59  | 0.04  | 0.02  | 5.71  | 0.07  | 0.04  | 0.62  | 0.98  | 0.09  | 0.40  | 89.36 | 0.48  | 0.02  | 0.00  | 0.18  |
| H63      | 0.13  | 0.01 | 0.00  | 0.05  | 8.89  | 0.05  | 0.11  | 0.14  | 0.00  | 66.80 | 0.65  | 0.00  | 0.17  | 0.10  | 0.12  | 0.04  | 0.01  | 22.67 | 0.01  | 0.03  |
| H64      | 0.22  | 0.00 | 0.11  | 3.02  | 0.00  | 0.18  | 0.12  | 0.02  | 74.73 | 0.10  | 0.37  | 1.36  | 0.02  | 10.80 | 7.30  | 0.38  | 1.16  | 0.05  | 0.04  | 0.02  |
| H65      | 0.17  | 0.07 | 0.87  | 0.38  | 0.02  | 21.71 | 0.06  | 0.12  | 0.02  | 0.01  | 0.01  | 2.94  | 0.13  | 0.00  | 1.26  | 65.33 | 6.82  | 0.04  | 0.01  | 0.01  |
| H95      | 6.36  | 0.45 | 12.36 | 5.68  | 1.11  | 18.56 | 3.11  | 4.86  | 1.52  | 4.24  | 1.37  | 1.32  | 1.49  | 2.46  | 12.94 | 8.04  | 5.89  | 5.82  | 1.00  | 1.42  |
| H96      | 4.61  | 0.42 | 4.08  | 3.69  | 2.05  | 12.97 | 2.34  | 3.57  | 2.38  | 7.80  | 0.86  | 2.60  | 10.05 | 3.04  | 13.84 | 8.12  | 5.87  | 4.98  | 1.84  | 4.89  |
| H97      | 5.83  | 1.65 | 5.14  | 2.80  | 3.14  | 17.11 | 2.91  | 3.51  | 1.44  | 4.78  | 1.32  | 2.81  | 5.73  | 1.72  | 8.57  | 9.63  | 5.61  | 5.84  | 1.87  | 8.59  |
| H98      | 7.29  | 1.34 | 6.15  | 2.40  | 2.80  | 16.77 | 1.44  | 3.39  | 0.69  | 3.68  | 1.17  | 3.27  | 3.55  | 1.53  | 5.99  | 11.66 | 6.81  | 6.37  | 3.25  | 10.45 |
| H99      | 7.98  | 1.33 | 5.40  | 2.07  | 3.60  | 15.78 | 1.59  | 2.39  | 0.92  | 4.64  | 1.07  | 3.23  | 2.76  | 1.27  | 4.80  | 14.47 | 6.97  | 5.12  | 2.97  | 11.65 |
| H100     | 7.41  | 0.95 | 6.13  | 1.81  | 5.16  | 16.17 | 1.38  | 2.86  | 1.29  | 4.04  | 1.11  | 2.80  | 2.69  | 1.07  | 4.24  | 14.05 | 5.77  | 5.56  | 5.29  | 10.22 |
| H100a    | 6.82  | 1.48 | 6.16  | 1.61  | 6.92  | 15.29 | 2.18  | 2.15  | 0.90  | 5.44  | 1.42  | 3.19  | 4.21  | 1.02  | 3.81  | 12.80 | 5.25  | 4.38  | 3.52  | 11.44 |
| H100b    | 5.81  | 1.93 | 4.50  | 1.58  | 9.81  | 15.07 | 1.47  | 2.30  | 0.91  | 3.96  | 1.42  | 3.80  | 3.88  | 1.03  | 3.92  | 10.81 | 4.76  | 4.30  | 6.70  | 12.05 |
| H100c    | 5.34  | 1.74 | 4.68  | 1.41  | 12.01 | 11.96 | 2.10  | 2.25  | 1.00  | 5.85  | 1.38  | 3.46  | 4.02  | 0.70  | 3.72  | 8.62  | 4.42  | 4.53  | 5.13  | 15.67 |
| H100d    | 5.97  | 2.70 | 4.18  | 2.03  | 12.45 | 11.04 | 2.25  | 1.59  | 1.08  | 4.11  | 1.60  | 3.14  | 4.20  | 0.61  | 3.54  | 7.84  | 3.88  | 3.79  | 4.42  | 19.59 |
| H100e    | 3.79  | 1.63 | 3.44  | 0.86  | 17.66 | 10.28 | 2.23  | 1.31  | 0.98  | 5.26  | 3.27  | 3.18  | 3.69  | 1.17  | 4.26  | 6.08  | 2.26  | 2.55  | 6.91  | 19.18 |
| H100f    | 4.51  | 1.77 | 3.67  | 0.93  | 18.58 | 9.98  | 1.55  | 1.32  | 1.19  | 4.14  | 5.08  | 3.82  | 3.95  | 0.57  | 4.07  | 5.18  | 1.83  | 1.96  | 3.57  | 22.33 |
| H100g    | 4.55  | 0.40 | 2.92  | 0.82  | 21.78 | 12.18 | 3.61  | 1.54  | 1.38  | 3.91  | 5.07  | 2.44  | 3.19  | 0.68  | 3.16  | 3.02  | 2.51  | 2.26  | 3.97  | 20.60 |
| H100h    | 5.27  | 0.38 | 2.27  | 1.59  | 25.47 | 11.06 | 1.69  | 1.08  | 1.12  | 3.49  | 7.26  | 2.64  | 2.91  | 0.81  | 1.98  | 2.97  | 2.07  | 1.40  | 3.65  | 20.89 |
| H100i    | 4.78  | 0.53 | 2.64  | 0.43  | 24.58 | 12.93 | 1.68  | 1.33  | 0.27  | 3.62  | 11.45 | 4.29  | 1.67  | 0.24  | 0.65  | 1.97  | 0.82  | 1.81  | 4.86  | 19.43 |
| H100j    | 5.30  | 0.25 | 0.30  | 0.06  | 32.66 | 9.95  | 0.73  | 0.60  | 0.06  | 4.46  | 21.95 | 0.26  | 1.26  | 0.06  | 0.38  | 0.76  | 0.64  | 1.23  | 6.51  | 12.61 |
| H100k    | 0.05  | 0.30 | 0.04  | 0.03  | 61.53 | 0.07  | 0.03  | 1.72  | 0.04  | 4.56  | 28.04 | 0.04  | 0.22  | 0.05  | 0.07  | 0.76  | 0.27  | 1.93  | 0.07  | 0.21  |
| H101     | 1.34  | 0.03 | 85.50 | 1.97  | 0.30  | 3.32  | 1.00  | 0.14  | 0.16  | 0.90  | 0.06  | 0.97  | 0.45  | 0.99  | 0.41  | 0.69  | 0.38  | 0.61  | 0.17  | 0.62  |
| H102     | 0.47  | 0.58 | 1.22  | 0.18  | 3.61  | 0.23  | 2.50  | 10.22 | 0.13  | 4.19  | 0.37  | 1.43  | 11.23 | 0.21  | 0.28  | 5.87  | 0.66  | 17.55 | 0.07  | 39.00 |

The percentages of the amino acid composition at each position in HCDRs having cut-off  $\geq 0.01$  are represented. In case of the amino acid compositions cut-off  $< 0.01$  were expressed as 0.00.



**Supplementary Table S4.** The average percentage of amino acid composition in HCDR3 of the constructed library.

| Amino acid composition (%) |     |     |     |      |      |     |     |     |     |     |     |     |     |     |     |     |     |     |      |
|----------------------------|-----|-----|-----|------|------|-----|-----|-----|-----|-----|-----|-----|-----|-----|-----|-----|-----|-----|------|
| A                          | C   | D   | E   | F    | G    | H   | I   | K   | L   | M   | N   | P   | Q   | R   | S   | T   | V   | W   | Y    |
| 4.9                        | 1.0 | 8.5 | 1.7 | 14.0 | 11.6 | 1.9 | 2.5 | 0.9 | 4.4 | 5.0 | 2.6 | 3.7 | 1.0 | 4.2 | 7.0 | 3.5 | 4.3 | 3.5 | 13.7 |

**Supplementary Table S5.** The percentage of amino acid composition at each position in LCDRs of the constructed library.

| Position | A     | C    | D     | E     | F     | G     | H     | I     | K     | L     | M     | N     | P     | Q     | R     | S     | T     | V     | W     | Y     |
|----------|-------|------|-------|-------|-------|-------|-------|-------|-------|-------|-------|-------|-------|-------|-------|-------|-------|-------|-------|-------|
| L24      | 0.01  | 0.00 | 0.00  | 0.12  | 0.00  | 0.65  | 0.02  | 0.02  | 23.25 | 0.04  | 0.10  | 0.04  | 0.01  | 5.57  | 69.13 | 0.10  | 0.46  | 0.01  | 0.46  | 0.00  |
| L25      | 64.08 | 0.04 | 0.01  | 0.01  | 0.02  | 0.14  | 0.00  | 0.01  | 0.00  | 0.01  | 0.04  | 0.00  | 0.38  | 0.01  | 0.00  | 33.85 | 0.99  | 0.41  | 0.00  | 0.01  |
| L26      | 0.03  | 0.07 | 0.03  | 0.00  | 0.00  | 0.84  | 0.01  | 0.04  | 0.01  | 0.01  | 0.00  | 0.56  | 0.01  | 0.00  | 0.31  | 97.29 | 0.78  | 0.00  | 0.00  | 0.00  |
| L27      | 0.00  | 0.00 | 0.04  | 1.78  | 0.00  | 0.03  | 1.60  | 0.00  | 0.08  | 0.51  | 0.00  | 0.00  | 0.15  | 94.47 | 1.26  | 0.01  | 0.00  | 0.01  | 0.00  | 0.04  |
| L27a     | 0.12  | 0.05 | 0.13  | 0.00  | 0.07  | 0.80  | 0.03  | 0.44  | 0.04  | 0.01  | 0.01  | 2.81  | 0.12  | 0.00  | 1.32  | 88.72 | 5.13  | 0.03  | 0.02  | 0.15  |
| L27b     | 0.14  | 0.00 | 0.01  | 0.00  | 0.14  | 0.02  | 0.01  | 5.62  | 0.00  | 46.89 | 0.00  | 0.00  | 0.12  | 0.00  | 0.01  | 0.00  | 0.01  | 47.00 | 0.00  | 0.00  |
| L27c     | 0.39  | 0.01 | 0.00  | 0.27  | 4.17  | 0.06  | 0.05  | 0.61  | 0.02  | 77.31 | 0.10  | 0.00  | 0.04  | 0.20  | 0.17  | 0.67  | 0.06  | 15.78 | 0.01  | 0.08  |
| L27d     | 0.28  | 0.10 | 3.07  | 0.07  | 3.11  | 0.16  | 27.79 | 0.01  | 0.61  | 0.51  | 0.00  | 2.65  | 0.10  | 0.73  | 0.51  | 4.89  | 0.06  | 0.04  | 0.28  | 55.03 |
| L27e     | 0.30  | 0.05 | 0.51  | 0.25  | 0.11  | 1.76  | 0.15  | 0.71  | 0.23  | 0.07  | 0.05  | 4.61  | 0.25  | 0.01  | 5.32  | 80.11 | 5.18  | 0.12  | 0.01  | 0.22  |
| L27f     | 2.12  | 0.03 | 1.44  | 0.09  | 1.33  | 0.27  | 0.03  | 0.08  | 0.02  | 0.19  | 0.00  | 0.16  | 3.92  | 0.02  | 0.03  | 88.08 | 0.60  | 0.41  | 0.00  | 1.16  |
| L28      | 1.05  | 0.02 | 19.52 | 0.14  | 0.46  | 15.05 | 0.41  | 1.71  | 0.52  | 0.68  | 0.02  | 23.63 | 0.12  | 0.01  | 0.48  | 21.25 | 2.38  | 12.16 | 0.00  | 0.40  |
| L29      | 0.44  | 0.02 | 0.58  | 0.11  | 0.35  | 14.47 | 0.09  | 38.36 | 0.84  | 0.77  | 0.14  | 18.55 | 0.11  | 0.02  | 0.81  | 10.77 | 1.42  | 11.98 | 0.00  | 0.16  |
| L30      | 1.03  | 0.04 | 3.29  | 0.38  | 0.27  | 4.76  | 0.79  | 0.66  | 20.05 | 0.22  | 0.18  | 11.06 | 0.08  | 0.37  | 5.87  | 42.93 | 2.60  | 0.45  | 0.13  | 4.86  |
| L31      | 0.46  | 0.02 | 4.44  | 0.13  | 0.14  | 1.41  | 0.64  | 1.35  | 1.58  | 0.05  | 0.06  | 40.45 | 0.12  | 0.06  | 2.91  | 29.75 | 15.54 | 0.15  | 0.02  | 0.72  |
| L32      | 1.59  | 0.61 | 4.85  | 0.15  | 4.62  | 0.18  | 2.54  | 0.03  | 0.42  | 0.50  | 0.01  | 6.98  | 0.03  | 0.30  | 0.36  | 4.72  | 0.20  | 0.04  | 6.59  | 65.30 |
| L33      | 0.01  | 0.00 | 0.00  | 0.00  | 1.01  | 0.00  | 0.00  | 0.64  | 0.00  | 94.41 | 1.52  | 0.00  | 0.00  | 0.00  | 0.00  | 0.10  | 0.01  | 2.28  | 0.01  | 0.01  |
| L34      | 62.38 | 0.04 | 5.39  | 0.12  | 0.23  | 3.99  | 1.02  | 0.26  | 0.05  | 0.07  | 0.01  | 18.27 | 0.06  | 0.02  | 0.03  | 3.22  | 1.66  | 1.21  | 0.00  | 1.96  |
| L50      | 19.17 | 0.06 | 15.94 | 5.40  | 0.18  | 20.53 | 0.29  | 0.05  | 6.96  | 5.06  | 0.23  | 0.23  | 0.11  | 0.67  | 1.04  | 1.62  | 1.74  | 0.64  | 19.56 | 0.54  |
| L51      | 80.09 | 0.00 | 0.04  | 0.13  | 0.03  | 5.07  | 0.01  | 1.13  | 0.02  | 0.39  | 0.02  | 0.03  | 0.25  | 0.00  | 0.02  | 0.98  | 3.23  | 8.55  | 0.00  | 0.00  |
| L52      | 0.50  | 0.03 | 0.02  | 0.00  | 1.08  | 0.02  | 0.02  | 0.09  | 0.00  | 0.08  | 0.00  | 0.05  | 0.23  | 0.00  | 0.01  | 94.90 | 2.58  | 0.05  | 0.01  | 0.33  |
| L53      | 0.77  | 0.01 | 0.73  | 0.05  | 0.15  | 0.39  | 0.63  | 2.23  | 1.81  | 0.07  | 0.07  | 23.93 | 0.04  | 0.29  | 2.25  | 25.54 | 40.13 | 0.24  | 0.01  | 0.66  |
| L54      | 0.00  | 0.01 | 0.00  | 0.00  | 0.24  | 0.13  | 0.01  | 0.02  | 0.06  | 37.68 | 0.08  | 0.01  | 0.05  | 0.02  | 60.40 | 0.41  | 0.09  | 0.28  | 0.51  | 0.00  |
| L55      | 32.87 | 0.00 | 5.38  | 27.45 | 3.54  | 0.59  | 1.17  | 0.12  | 0.99  | 0.47  | 0.01  | 0.08  | 0.39  | 23.71 | 0.48  | 0.10  | 0.11  | 2.39  | 0.01  | 0.15  |
| L56      | 1.74  | 0.06 | 0.16  | 0.03  | 0.41  | 1.00  | 0.03  | 0.46  | 0.07  | 0.07  | 0.05  | 0.93  | 3.07  | 0.00  | 0.83  | 60.40 | 30.45 | 0.11  | 0.00  | 0.12  |
| L89      | 0.02  | 0.05 | 0.00  | 0.12  | 0.03  | 0.02  | 3.07  | 0.10  | 0.19  | 5.34  | 13.19 | 0.13  | 0.06  | 77.04 | 0.16  | 0.17  | 0.06  | 0.21  | 0.00  | 0.04  |
| L90      | 0.01  | 0.01 | 0.03  | 0.64  | 0.00  | 0.02  | 4.46  | 0.01  | 1.52  | 0.44  | 0.01  | 0.34  | 0.08  | 91.17 | 0.71  | 0.18  | 0.06  | 0.08  | 0.02  | 0.23  |
| L91      | 7.31  | 0.69 | 0.97  | 0.05  | 2.88  | 5.75  | 4.75  | 0.38  | 0.01  | 4.38  | 0.08  | 0.65  | 0.12  | 0.09  | 5.65  | 10.58 | 2.24  | 0.65  | 0.02  | 52.73 |
| L92      | 1.28  | 0.21 | 9.53  | 0.90  | 1.67  | 12.88 | 2.58  | 2.80  | 2.00  | 5.49  | 0.11  | 16.85 | 0.02  | 0.28  | 1.06  | 6.85  | 6.00  | 0.86  | 0.09  | 28.54 |
| L93      | 0.97  | 0.04 | 4.19  | 1.00  | 0.29  | 3.39  | 5.61  | 1.69  | 1.04  | 0.66  | 0.10  | 17.49 | 0.14  | 7.47  | 2.63  | 42.49 | 9.40  | 0.45  | 0.05  | 0.90  |
| L94      | 3.47  | 0.08 | 0.48  | 0.05  | 8.01  | 0.57  | 0.47  | 2.64  | 0.08  | 7.84  | 0.30  | 1.18  | 1.76  | 0.09  | 0.53  | 18.03 | 23.26 | 1.53  | 16.21 | 13.42 |
| L95      | 0.52  | 0.00 | 0.03  | 0.08  | 0.41  | 0.23  | 0.29  | 0.12  | 0.03  | 4.13  | 0.10  | 0.02  | 88.41 | 0.49  | 1.33  | 2.72  | 0.48  | 0.42  | 0.12  | 0.05  |
| L95a     | 3.71  | 0.29 | 0.18  | 0.81  | 0.80  | 3.52  | 1.15  | 0.85  | 0.34  | 9.20  | 1.52  | 0.06  | 57.68 | 3.01  | 6.86  | 7.32  | 1.30  | 0.87  | 0.18  | 0.35  |
| L95b     | 7.60  | 0.05 | 0.81  | 10.27 | 0.87  | 20.33 | 0.05  | 3.02  | 1.24  | 8.76  | 7.69  | 0.51  | 5.15  | 0.90  | 10.40 | 10.02 | 6.35  | 4.47  | 1.29  | 0.22  |
| L95c     | 1.48  | 0.00 | 0.98  | 2.95  | 1.62  | 24.84 | 0.06  | 19.50 | 0.19  | 4.21  | 3.65  | 0.36  | 18.19 | 0.08  | 1.07  | 11.25 | 7.65  | 1.53  | 0.14  | 0.25  |
| L95d     | 6.90  | 0.04 | 44.57 | 0.76  | 0.09  | 4.45  | 0.04  | 0.22  | 0.13  | 4.14  | 0.71  | 0.09  | 9.71  | 0.00  | 0.22  | 24.80 | 0.49  | 2.27  | 0.00  | 0.36  |
| L95e     | 0.36  | 0.00 | 3.21  | 0.00  | 0.36  | 17.86 | 0.00  | 0.00  | 0.00  | 0.71  | 10.36 | 0.00  | 52.50 | 1.79  | 0.36  | 10.36 | 1.43  | 0.71  | 0.00  | 0.00  |
| L95f     | 0.00  | 0.00 | 15.69 | 9.80  | 7.84  | 3.92  | 0.00  | 0.00  | 0.00  | 0.00  | 41.18 | 0.00  | 9.80  | 0.00  | 0.00  | 3.92  | 7.84  | 0.00  | 0.00  | 0.00  |
| L96      | 0.44  | 0.32 | 0.36  | 0.21  | 12.67 | 1.36  | 1.33  | 20.60 | 0.19  | 27.82 | 0.20  | 0.61  | 8.12  | 1.15  | 5.01  | 1.21  | 0.56  | 4.45  | 3.84  | 9.58  |
| L97      | 1.46  | 0.01 | 0.06  | 0.01  | 0.20  | 0.29  | 0.10  | 0.52  | 0.06  | 0.67  | 0.04  | 0.26  | 0.48  | 0.01  | 0.18  | 2.30  | 93.14 | 0.21  | 0.00  | 0.00  |

The percentages of the amino acid composition at each position in LCDRs having cut-off  $\geq 0.01$  are represented. In case of the amino acid compositions cut-off  $< 0.01$  were expressed as 0.00.

**Supplementary Table S6.** The average percentage of amino acid composition in LCDR3 of the constructed library.

| Amino acid composition (%) |     |     |     |     |     |     |     |     |     |     |     |      |      |     |      |      |     |     |     |
|----------------------------|-----|-----|-----|-----|-----|-----|-----|-----|-----|-----|-----|------|------|-----|------|------|-----|-----|-----|
| A                          | C   | D   | E   | F   | G   | H   | I   | K   | L   | M   | N   | P    | Q    | R   | S    | T    | V   | W   | Y   |
| 2.4                        | 0.1 | 5.4 | 1.8 | 2.5 | 6.6 | 1.6 | 3.5 | 0.5 | 5.6 | 5.3 | 2.6 | 16.8 | 12.2 | 2.4 | 10.1 | 10.7 | 1.2 | 1.5 | 7.1 |

**Supplementary Table S7.** Primers used for the generation of scFv sequences.

| Primer name | 5' to 3' Sequence                         |
|-------------|-------------------------------------------|
| RSC-F       | GAGGAGGAGGAGGAGGAGGCGGGGCCCAGGCGGCCGAGCTC |
| RSC-F_2     | GAGGAGGAGGAGGAGGAGGCGGGGCCCAGGCGGCC       |
| RSC-B       | GAGGAGGAGGAGGAGGAGCCTGGCCGGCCTGGCCACTAGTG |
